# Supplementary material for: Metal selectivity by the virulence-associated yersiniabactin metallophore system
Source: Royal Society of Chemistry journal article supplement (doi:10.1039/c4mt00341a), 2015-01-01
Supplement: c4mt00341a1.pdf [file c4mt00341a1.pdf]

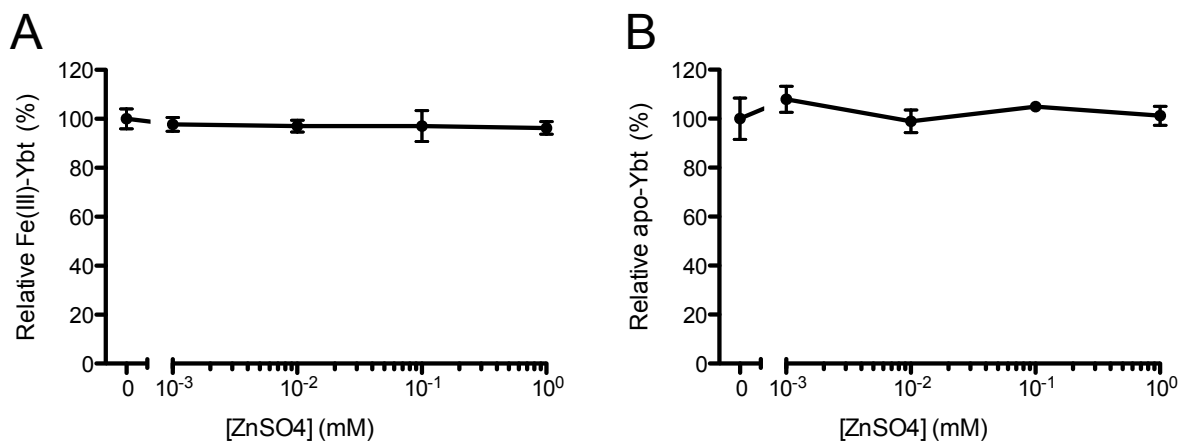

1

2 **Supplementary Figure 1. Fe(III)-Ybt and apo-Ybt levels do not decrease in presence of**  
3 **excess zinc ions.** HPLC-purified Fe(III)-Ybt and apo-Ybt were separately incubated with  
4 excess zinc ions. Samples were eluted on C18 silica columns to remove unbound zinc ions and  
5 <sup>13</sup>C-labeled Fe(III)-Ybt was added just prior to elution to normalize for column retention. Fe(III)-  
6 Ybt and apo-Ybt levels were measured using MRM detection method. Relative levels were  
7 calculated using MRM peak areas normalized with <sup>13</sup>C-labeled internal standard. **(A)** Fe(III)-Ybt  
8 and **(B)** apo-Ybt levels did not change despite mixing with zinc ions in molar excess. Results are  
9 shown as mean ± s.d.; *n*=3.

10

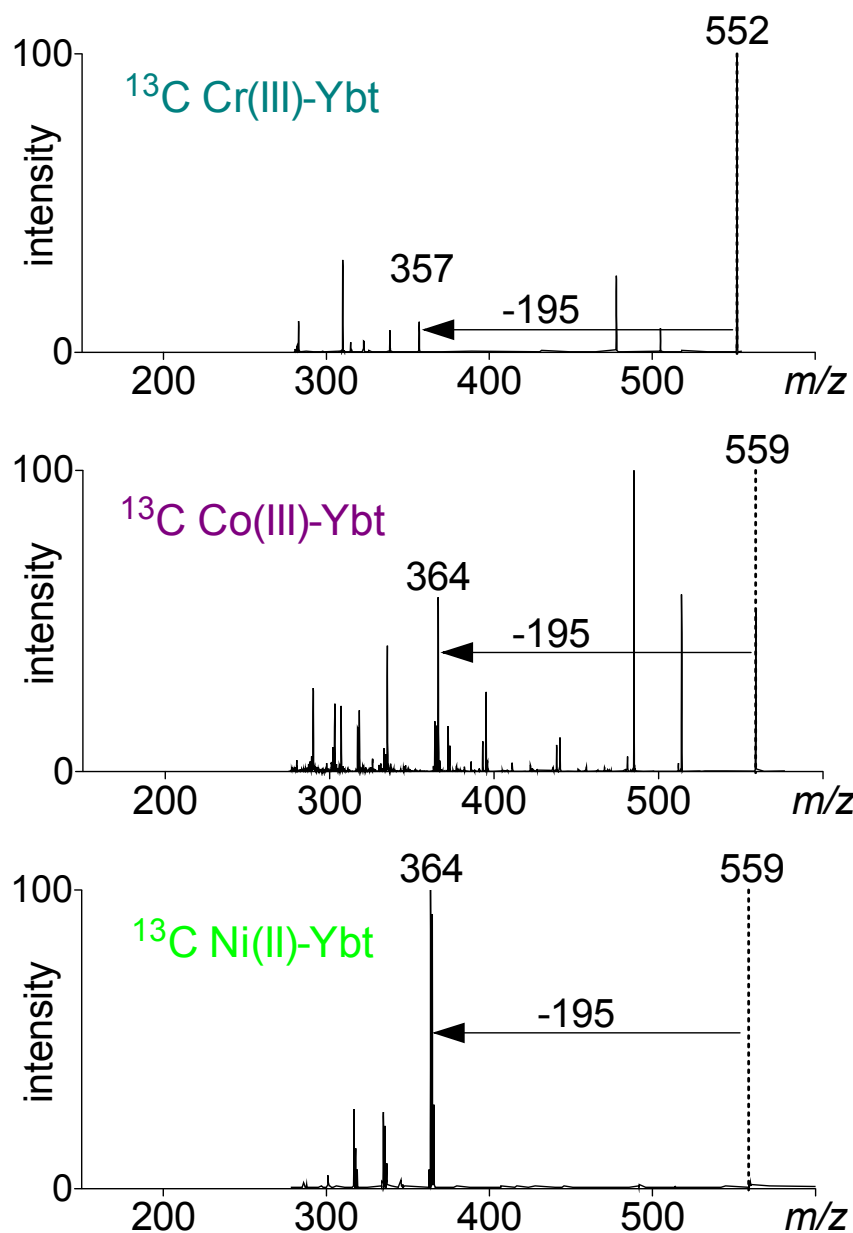

11

12 **Supplementary Figure 2. Structural confirmation of metal-Ybt complexes by stable**

13 **isotope labeling.** MS/MS of new  $^{13}\text{C}$ -labeled metal-Ybt complexes revealed a shifted dominant

14 MS/MS neutral loss of 195 mass units, corresponding to loss of a fragment containing eight

15 carbons as previously observed for Fe(III)-Ybt and Cu(II)-Ybt.

### Neutral Ferric Yersiniabactin Complex, calculated

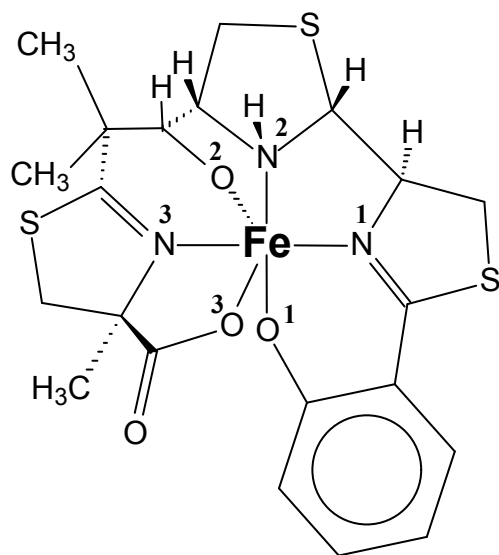

| Bond    | Bond Lengths |                      |
|---------|--------------|----------------------|
|         | Calculated   | Crystal Structure(A) |
| Fe-O(1) | 1.913        | 1.920                |
| Fe-O(2) | 1.902        | 1.899                |
| Fe-O(3) | 2.007        | 2.078                |
| Fe-N(1) | 2.084        | 2.084                |
| Fe-N(2) | 2.322        | 2.255                |
| Fe-N(3) | 2.164        | 2.130                |

Mean absolute deviation: 0.030

RMS deviation: 0.042

In Angstroms

16

17 **Supplementary Figure 3. Comparison of neutral Fe(III)-Ybt complexes.** Figure and Table

18 show comparison of ligand bond lengths to the ferric ion between as calculated (**Theoretical**

19 **Calculations** under **Materials and Methods**) to the published crystal structure<sup>20</sup> (structure A of

20 four in unit cell) of neutral Fe(III)-Ybt.

21

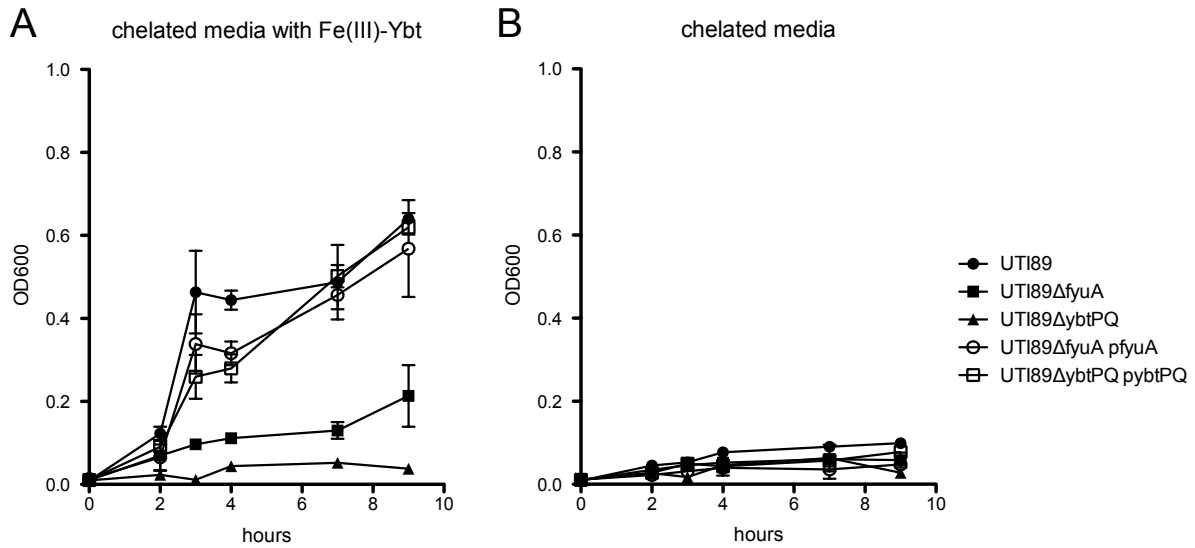

22

23 **Supplementary Figure 4. FyuA and YbtPQ are necessary for Fe(III)-Ybt-dependent growth**

24 **in UPEC. (A)** Fe(III)-Ybt-dependent growth is limited in UTI89 mutants lacking FyuA and YbtPQ.

25 In this condition, Fe(III)-Ybt is added to a rich media in which bioavailable ferric ions are

26 chelated with EDDHA. Plasmid-complemented mutants show restored growth with exogenous

27 Fe(III)-Ybt. **(B)** UTI89 strains are indistinguishable in the absence of Fe(III)-Ybt in chelated

28 media.

29
